# Supplementary material for: A mixture of citrus polymethoxyflavones, green tea polyphenols and lychee extracts attenuates adipogenesis in 3T3-L1 adipocytes and obesity-induced adipose inflammation in mice
Source: Royal Society of Chemistry journal article supplement (doi:10.1039/c9fo02235j), 2019-01-01
Supplement: c9fo02235j1.pdf [file c9fo02235j1.pdf]

### **Supplementary Materials**

Antibodies for C/EBP $\beta$ , CDK2, Cyclin E, F4/80, iNOS, p21, PPAR $\gamma$  and SREBP-1c were obtained from Santa Cruz Biotechnology (Santa Cruz, CA, USA). C/EBP $\alpha$ , p-AMPK $\alpha$  (Thr172), AMPK $\alpha$ , p-ACC (Ser79), IL-1 $\beta$  and p-p53 (Ser15) antibodies were purchased from Cell Signaling Technology (Beverly, MA, USA). FAS antibody was purchased from Becton, Dickinson and Company (Franklin Lakes, NJ, USA).

The CD11b, CD163, IL-6, IL-10 and MCP-1 antibodies were obtained from Abcam (Cambridge, UK).  $\alpha$ -tubulin antibody was purchased from GeneTex Inc. (Irvine, CA, USA).  $\beta$ -actin and GAPDH antibodies were purchased from Sigma Chemical Co. (St. Louis, MO, USA). The horseradish peroxidase (HRP)-conjugated secondary antibodies were obtained from Jackson ImmunoResearch (West Grove, PA).
